# Supplementary material for: Temporal Acoustic Patterns of the Oriental Turtle Dove in a Subtropical Forest in China
Source: MDPI journal article supplement (doi:10.3390/d14121043), 2022-11-28
Supplement: s1 [file s1]

Supplemental Table S1. Spatial location and collection days of the sampling sites

| Sample site | Longitude<br>(degree) | Latitude<br>(degree) | Elevation<br>(m) | Type              | Recording days |
|-------------|-----------------------|----------------------|------------------|-------------------|----------------|
| 1           | 116.11' E             | 31.01' N             | 1341             | experimental area | 344            |
| 2           | 116.06' E             | 30.97' N             | 1211             | buffer area       | 343            |
| 3           | 116.07' E             | 31.00' N             | 1090             | buffer area       | 355            |
| 4           | 116.10' E             | 31.08' N             | 689              | experimental area | 358            |
| 5           | 116.12' E             | 31.08' N             | 805              | experimental area | 358            |
| 6           | 116.09' E             | 30.99' N             | 1180             | buffer area       | 169            |

Supplemental Table S2. The number of calls (based on the mean number of each 1/6 month) of the Oriental Turtle Dove was detected per month at six sites. The total number and percentage of calls detected per month, with respect to the total number of calls, are also shown

| Month     | Site 1 | Site 2 | Site 3 | Site 4 | Site 5 | Site 6 | Total   | Percentage |
|-----------|--------|--------|--------|--------|--------|--------|---------|------------|
| April     | 64.60  | 0.20   | 52.20  | 0.00   | 123.60 | 38.00  | 278.60  | 7.57%      |
| May       | 45.23  | 36.10  | 480.33 | 52.00  | 22.60  | 115.63 | 751.90  | 20.43%     |
| June      | 52.20  | 0.00   | 173.80 | 0.80   | 13.00  | 1.20   | 241.00  | 6.55%      |
| July      | 425.57 | 43.77  | 372.50 | 141.60 | 109.92 | 330.13 | 1423.48 | 38.67%     |
| August    | 132.03 | 0.00   | 148.77 | 8.80   | 122.67 | 63.07  | 475.33  | 12.91%     |
| September | 24.10  | 0.00   | 29.40  | 4.80   | 17.80  | 167.30 | 243.40  | 6.61%      |
| October   | 0.40   | 0.00   | 8.20   | 0.00   | 0.00   | 0.00   | 8.60    | 0.23%      |
| November  | 0.00   | 0.00   | 0.00   | 0.00   | 0.00   | NA     | 0.00    | 0.00%      |
| December  | 0.00   | 0.00   | 0.00   | 0.00   | 0.00   | NA     | 0.00    | 0.00%      |
| January   | 0.00   | 0.00   | 0.00   | 0.00   | 0.00   | NA     | 0.00    | 0.00%      |
| February  | 0.00   | 0.00   | 0.00   | 0.00   | 0.00   | NA     | 0.00    | 0.00%      |
| March     | 20.00  | 3.20   | 180.37 | 9.20   | 46.00  | NA     | 258.77  | 7.03%      |

Supplemental Table S3. The number of calls (based on the mean number of each 1/6 month) of the Oriental Turtle Dove was detected per hour at six sites. The total number and percentage of calls detected per hour, with respect to the total number of calls, are also shown

| Hour | Site 1 | Site 2 | Site 3 | Site 4 | Site 5 | Site 6 | Total  | Percentage |
|------|--------|--------|--------|--------|--------|--------|--------|------------|
| 0    | 0.00   | 0.00   | 0.00   | 0.00   | 0.00   | 0.00   | 0.00   | 0.00%      |
| 1    | 0.00   | 0.00   | 0.00   | 0.00   | 0.00   | 0.00   | 0.00   | 0.00%      |
| 2    | 0.00   | 0.00   | 0.00   | 0.00   | 0.00   | 0.00   | 0.00   | 0.00%      |
| 3    | 0.00   | 0.00   | 0.00   | 0.00   | 0.00   | 0.00   | 0.00   | 0.00%      |
| 4    | 0.20   | 3.40   | 0.00   | 0.00   | 0.00   | 0.00   | 3.60   | 0.10%      |
| 5    | 47.33  | 13.20  | 136.63 | 13.40  | 38.43  | 84.67  | 333.67 | 9.06%      |
| 6    | 200.60 | 19.10  | 249.00 | 31.00  | 86.60  | 231.77 | 818.07 | 22.22%     |
| 7    | 187.73 | 12.13  | 166.10 | 10.00  | 92.97  | 182.63 | 651.57 | 17.70%     |
| 8    | 77.37  | 8.60   | 132.83 | 36.00  | 66.53  | 100.00 | 421.33 | 11.45%     |
| 9    | 44.77  | 4.27   | 119.67 | 24.60  | 38.92  | 23.37  | 255.58 | 6.94%      |
| 10   | 38.83  | 1.10   | 48.17  | 2.20   | 15.80  | 7.97   | 114.07 | 3.10%      |
| 11   | 16.53  | 1.33   | 31.20  | 15.40  | 9.63   | 8.40   | 82.50  | 2.24%      |
| 12   | 29.97  | 0.00   | 39.20  | 2.60   | 20.20  | 6.83   | 98.80  | 2.68%      |
| 13   | 22.47  | 4.93   | 25.40  | 17.60  | 11.20  | 2.70   | 84.30  | 2.29%      |
| 14   | 8.80   | 0.00   | 68.77  | 20.40  | 8.20   | 6.70   | 112.87 | 3.07%      |
| 15   | 2.20   | 0.00   | 84.40  | 1.60   | 5.90   | 8.20   | 102.30 | 2.78%      |
| 16   | 19.13  | 0.00   | 92.80  | 24.80  | 20.60  | 12.80  | 170.13 | 4.62%      |

|    |       |       |        |       |       |       |        |       |
|----|-------|-------|--------|-------|-------|-------|--------|-------|
| 17 | 28.70 | 12.20 | 118.97 | 13.40 | 21.80 | 15.03 | 210.10 | 5.71% |
| 18 | 25.90 | 0.00  | 119.43 | 4.20  | 18.20 | 23.67 | 191.40 | 5.20% |
| 19 | 13.60 | 3.00  | 13.00  | 0.00  | 0.60  | 0.60  | 30.80  | 0.84% |
| 20 | 0.00  | 0.00  | 0.00   | 0.00  | 0.00  | 0.00  | 0.00   | 0.00% |
| 21 | 0.00  | 0.00  | 0.00   | 0.00  | 0.00  | 0.00  | 0.00   | 0.00% |
| 22 | 0.00  | 0.00  | 0.00   | 0.00  | 0.00  | 0.00  | 0.00   | 0.00% |
| 23 | 0.00  | 0.00  | 0.00   | 0.00  | 0.00  | 0.00  | 0.00   | 0.00% |

---
